# Supplementary material
Source: PubMed Central journal article supplement (PMC3888124)
Supplement: supp_ddt330_ddt330supp.pdf [file supp_ddt330_ddt330supp.pdf]

## SUPPLEMENTAL DATA

### Supplemental Material and Methods

#### Generation of *Mclk1* knockout MEFs expressing either wild-type or mutant MCLK1

Full-length wild-type MCLK1 cDNA was generated by PCR amplification using wild type C57BL/6 (B6) mouse embryo cDNA as a template. The primers containing added *Bam*HI and *Eco*RI sites, 5'-CGATGA GGATCCACCATGAGCGCCGCCGGAGCCATA-3' and 5'-TGTGCTGAATTCCTAAAACCTTTCTGATAAATATATGGCTGC-3', were used to perform PCR. To construct pBabe-hygro-MCLK1, the resulting PCR products were double-digested with *Bam*HI and *Eco*RI (Invitrogen) and ligated into the *Bam*HI/*Eco*RI site of the retroviral vector pBabe-hygro (obtained from Addgene). pBabe-hygro-MCLK1 (E178K) construct which contains a single point mutation (a G-to-A transition) at codon 178 was generated by performing site-direct mutagenesis on pBabe-hygro-MCLK1, using a QuikChange XL site-directed mutagenesis kit (Stratagene) according to the manufacturer's directions. Constructs were verified by sequencing. The procedure for introducing pBabe-hygro, pBabe-hygro-MCLK1 or pBabe-hygro-MCLK1 (E178K) DNA into *Mclk1*<sup>Δ/Δ</sup>-*Cre* MEFs (described in the main text) was the same as described for retroviral delivery of *Cre* gene into *Mclk1*<sup>loxP/loxP</sup> MEFs. Cells infected with the pBabe-hygro vectors were selected by hygromycin (200 μg/ml) for 2 days.

#### Measurement of cellular ATP levels

MEFs were rinsed twice with ice cold PBS and intracellular ATP was extracted in 0.5% trichloroacetic acid. The supernatants obtained following a 5-min spin at 13,000 rpm were diluted 50 times in HEPES buffer (25 mM, pH 7.75) for bioluminescent ATP content measurement using Promega ENLITEN®rLuciferase/Luciferin reagent as instructed by the manufacturer. The pellet was dissolved in 0.5 N sodium hydroxide for total protein measurement using the Bradford Protein Assay (Bio-Rad Laboratories, Inc.). For treatment with oligomycin, cells were treated with 10 μg/ml oligomycin for 2 h and then processed for measurement of ATP content.

#### Exposure of cells to 2-deoxyglucose

MEFs were seeded in 48-well plates overnight and then incubated with different concentrations of 2-deoxyglucose (2-DG). 48 h later, cell viability was quantitatively determined by alamarBlue Cell Viability Assay (Invitrogen).

#### Determination of aconitase activity

Aconitase activity in liver mitochondria was measured spectrophotometrically as described previously.<sup>1</sup>

### Supplemental Figures

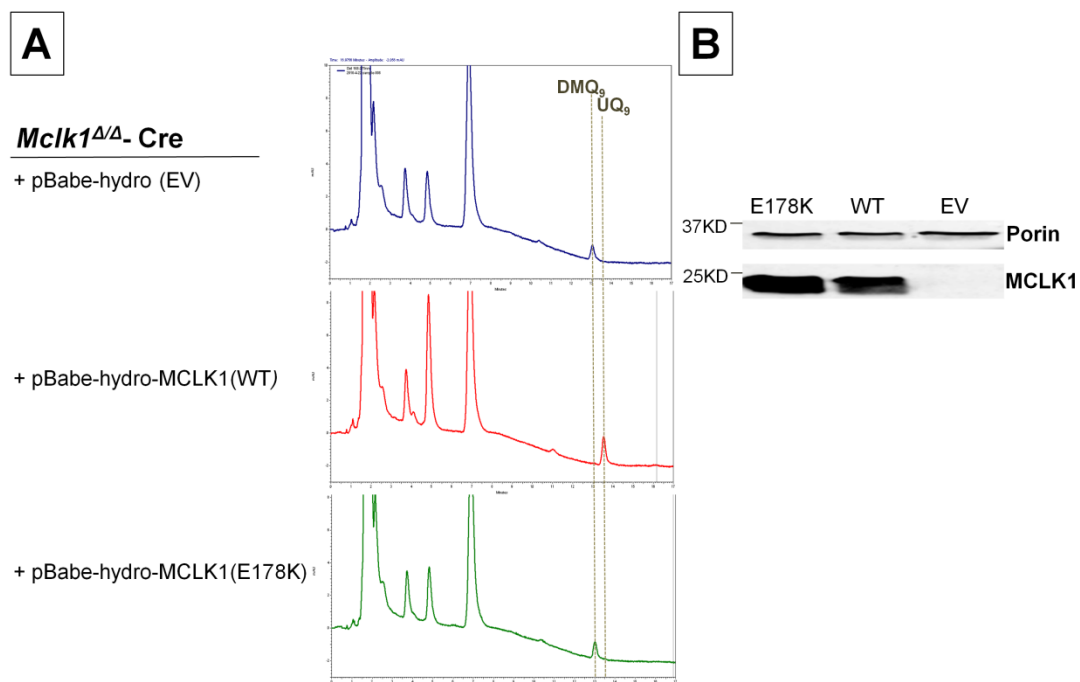

**Figure S1. Restoration of UQ biosynthesis in *Mclk1* knockout MEFs by re-expression of MCLK1.**

**(A)** *Mclk1*<sup>Δ/Δ</sup>-Cre MEFs infected with empty vector (EV) or pBabe-hydro retroviral vectors expressing either wild-type MCLK1 (WT) or the MCLK1 E178K mutant. MCLK1 (E178K) contains a point mutation equivalent to the Glu-to-Lys substitution in the worm *clk-1(e2519)* allele. UQ<sub>9</sub> synthesis is restored only in the *Mclk1*<sup>Δ/Δ</sup>-Cre MEFs infected with the retroviral vector expressing wild-type MCLK1.

**(B)** Western blotting of MCLK1 in *Mclk1*<sup>Δ/Δ</sup>-Cre MEFs infected with retroviruses encoding empty vector (EV), wild-type MCLK1 (WT) or the MCLK1 (E178K) mutant. MCLK1 expression is restored in the cells infected with the retroviral vector encoding wild-type MCLK1. Cells infected with pBabe-hydro-MCLK1 (E178K) produce a nonfunctional mutant MCLK1 protein. The outer mitochondrial membrane porin served as a loading control.

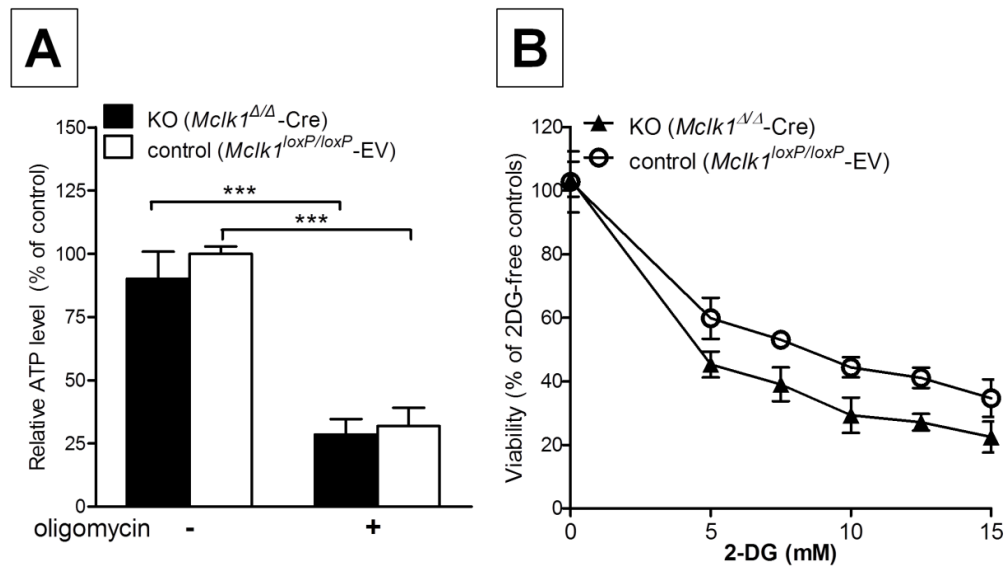

**Figure S2. ATP levels and sensitivity to glycolytic inhibition.**

(A) Intracellular ATP content before and after oligomycin. Cellular ATP level was measured with or without exposure to oligomycin (10  $\mu\text{g}/\text{ml}$ ) for 2 h. Results were normalized to cellular protein concentration and reported as a percentage of the level in control cells not treated with oligomycin. ATP content in whole cell lysates is not different between *Mclk1* knockout MEFs (*Mclk1*<sup>Δ/Δ</sup>-Cre) and controls (the same MEF lines infected with empty retroviral vector, *Mclk1*<sup>loxP/loxP</sup>-EV). Data are expressed as mean  $\pm$  SEM obtained from 3 independent MEF lines. A paired *t* test was performed to identify statistically significant differences. \*\*\* significance of difference at  $p < 0.001$ .

(B) Survival percentages of *Mclk1* knockout (*Mclk1*<sup>Δ/Δ</sup>-Cre) and control MEFs (*Mclk1*<sup>loxP/loxP</sup>-EV) after exposure to glycolytic inhibition by 2-deoxyl-D-glucose (2-DG). Cells were treated with the indicated concentrations of 2-DG for over 48 h. Survival was then measured using alamarBlue Cell Viability Assay. Data are expressed as percent cell survival relative to that of untreated (mean  $\pm$  SD from 3 replicate wells). The measurement was repeated with three matched pairs of MEFs lines, and a representative result is shown. *Mclk1* knockout MEFs showed a higher sensitivity to 2-DG-induced toxicity than controls ( $p < 0.001$ , two-way ANOVA, the effect of 2-DG vs. genotype comparison).

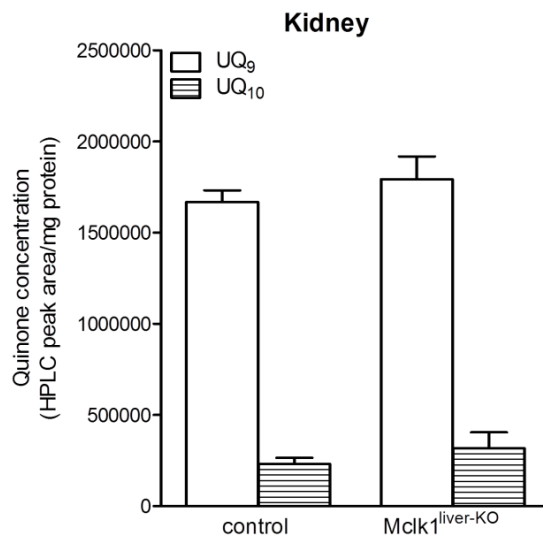

**Figure S3. UQ content is not changed in the kidney of *Mclk1*<sup>liver-KO</sup> mice.**

Quinones were extracted from the kidney of 15-month-old female *Mclk1*<sup>liver-KO</sup> mice (*Mclk1*<sup>loxP/-</sup>, *AlbCre*<sup>+</sup>) or their control littermates (*Mclk1*<sup>loxP/-</sup>). No difference in kidney ubiquinone content was found between the two groups of mice. Columns represent the mean  $\pm$  SEM of peak areas for UQs on HPLC chromatographs normalized to total protein amount. DMQ was not detected in the kidney of *Mclk1*<sup>liver-KO</sup> or control mice. n = 5 mice per group.

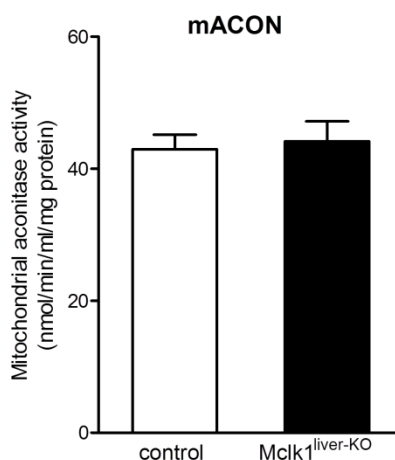

**Figure S4. Mitochondrial aconitase activity in *Mclk1* knockout liver.**

Aconitase activity in the liver mitochondria of 8-month-old female *Mclk1*<sup>liver-KO</sup> mice (*Mclk1*<sup>loxP/-</sup>, *AlbCre*<sup>+</sup>) is not different from that of *Mclk1*<sup>loxP/-</sup> littermate controls. The columns are the means  $\pm$  SEM for 9 mice per group. A paired *t* test was used to determine statistical significance of the difference between *Mclk1* knockout livers and controls.

**Table S1. Respiratory parameters of isolated liver mitochondria.** All measurements were done on liver mitochondria isolated from 15-month-old *Mclk1<sup>liver-KO</sup>* mice (*Mclk1<sup>lox/-</sup>, AlbCre+*) or their littermate controls (*Mclk1<sup>lox/-</sup>*). State 3 respiration rate was recorded with the addition of ADP. After exhaustion of ADP, state 4 respiration rate was determined. RCR (Respiratory Control Ratio) was calculated as the ratio of state 3 over state 4. The ADP/O ratio is the ratio of nmoles of ADP phosphorylated to nmoles of oxygen consumed. Values are mean  $\pm$  SEM (n = 8 mice per group). A paired *t* test was used to determine statistical significance of the difference between the knockout livers and controls. \**p*<0.05;\*\*\* *p*<0.001. With either Complex I (glutamate plus malate) or Complex II (succinate plus rotenone) substrates, state 3 respiration rate is significantly lower in the mitochondria from *Mclk1* knockout livers compared to controls, whereas no difference is observed for state 4 respiration. RCR in *Mclk1* knockout liver mitochondria tends to be reduced but not significantly. ADP/O ratio is similar in liver mitochondria from *Mclk1<sup>liver-KO</sup>* or control mice.

| Substrates           | State 3             | State 4        | RCR           | ADP/O         |
|----------------------|---------------------|----------------|---------------|---------------|
| Glutamate + Malate   |                     |                |               |               |
| Liver KO             | 131.7 $\pm$ 5.6*    | 30.6 $\pm$ 1.7 | 5.2 $\pm$ 0.2 | 2.5 $\pm$ 0.1 |
| Control              | 150.6 $\pm$ 5.3     | 30.1 $\pm$ 1.7 | 5.6 $\pm$ 0.2 | 2.4 $\pm$ 0.1 |
| Succinate + Rotenone |                     |                |               |               |
| Liver KO             | 221.5 $\pm$ 11.1*** | 49.2 $\pm$ 5.0 | 4.3 $\pm$ 0.2 | 1.4 $\pm$ 0.1 |
| Control              | 267.0 $\pm$ 8.2     | 53.6 $\pm$ 3.1 | 4.9 $\pm$ 0.2 | 1.5 $\pm$ 0.0 |

### Supplemental References

1. Lapointe, J., Wang, Y., Bigras, E., and Hekimi, S. (2012). The submitochondrial distribution of ubiquinone affects respiration in long-lived *Mclk1*<sup>+/-</sup> mice. *J Cell Biol* 199, 215-224.
